# Supplementary material
Source: PubMed Central journal article supplement (PMC6646040)
Supplement: ao8b00708_si_001.pdf [file ao8b00708_si_001.pdf]

# Visible light mediated electrocatalytic activity in reduced graphene oxide supported bismuth ferrite

Ayan Mukherjee<sup>1</sup>, Sankalpita Chakrabarty<sup>1</sup>, Neetu Kumari<sup>1</sup>, Wei-Nien Su<sup>2</sup>,Suddhasatwa Basu<sup>1\*</sup>

<sup>1</sup>Department of Chemical Engineering, Indian Institute of Technology Delhi, New Delhi 110016, India

<sup>2</sup>NanoElectrochemistry Laboratory, Graduate Institute of Applied Science and Technology, National Taiwan University of Science and Technology, Taipei 106, Taiwan

## Content

|                                                                                                                                                                                                                                                         |     |
|---------------------------------------------------------------------------------------------------------------------------------------------------------------------------------------------------------------------------------------------------------|-----|
| <b>1. Result and discussions:</b>                                                                                                                                                                                                                       | S3  |
| 1.1 Figure S1 XRD pattern of BFO calcined at 400 °C, 500°C and 600°C                                                                                                                                                                                    | S3  |
| 1.2 Figure S2 Rhombohedral cage of (a) BFO, (b) RGO-BFO                                                                                                                                                                                                 | S4  |
| 1.3 Figure S3 HRTEM image of BFO                                                                                                                                                                                                                        | S5  |
| 1.4 Figure S4 SAED pattern of BFO                                                                                                                                                                                                                       | S6  |
| 1.5 Figure S5 O1s core-level electron of BFO                                                                                                                                                                                                            | S7  |
| 1.6 Figure S6 Tauc plot for determining band gap of BFO and RGO-BFO                                                                                                                                                                                     | S8  |
| 1.7 Figure S7 (a) Degradation of Uv-vis spectra of RhB over RGO-BFO, (b) Photocatalytic degradation efficiency of RhB without and with RGO-BFO, (c) Pseudo first order rate constant for the photodecomposition, (d) Energy diagram of RhB, RGO and BFO | S9  |
| 1.8 Figure S8 Percentage degradation of RhB dye in terms of COD values with time for different RGO and RGO-BFO                                                                                                                                          | S10 |
| 1.9 Figure S9 Schematic diagram of band bending for (a) BFO and (b) RGO-BFO in 1M KOH electrolyte                                                                                                                                                       | S11 |
| 1.10 Table S1 Reitveld refinement parameters of BFO and RGO-BFO                                                                                                                                                                                         | S12 |
| 1.11 Table S2. Various Raman modes observed in BFO                                                                                                                                                                                                      | S12 |
| 1.12 Table S3. Performance comparison of different catalysts including RGO-BFO for degradation of various organic contaminant                                                                                                                           | S13 |

|                                                                                                                       |            |
|-----------------------------------------------------------------------------------------------------------------------|------------|
| 1.13 Table S4. Performance comparison of various catalysts including RGO-BFO for Photoelectrochemical water splitting | S14        |
| <b>2. References</b>                                                                                                  | <b>S15</b> |
| <b>Total number of pages</b>                                                                                          | <b>17</b>  |
| <b>Total number of figures</b>                                                                                        | <b>09</b>  |
| <b>Total number of tables</b>                                                                                         | <b>04</b>  |

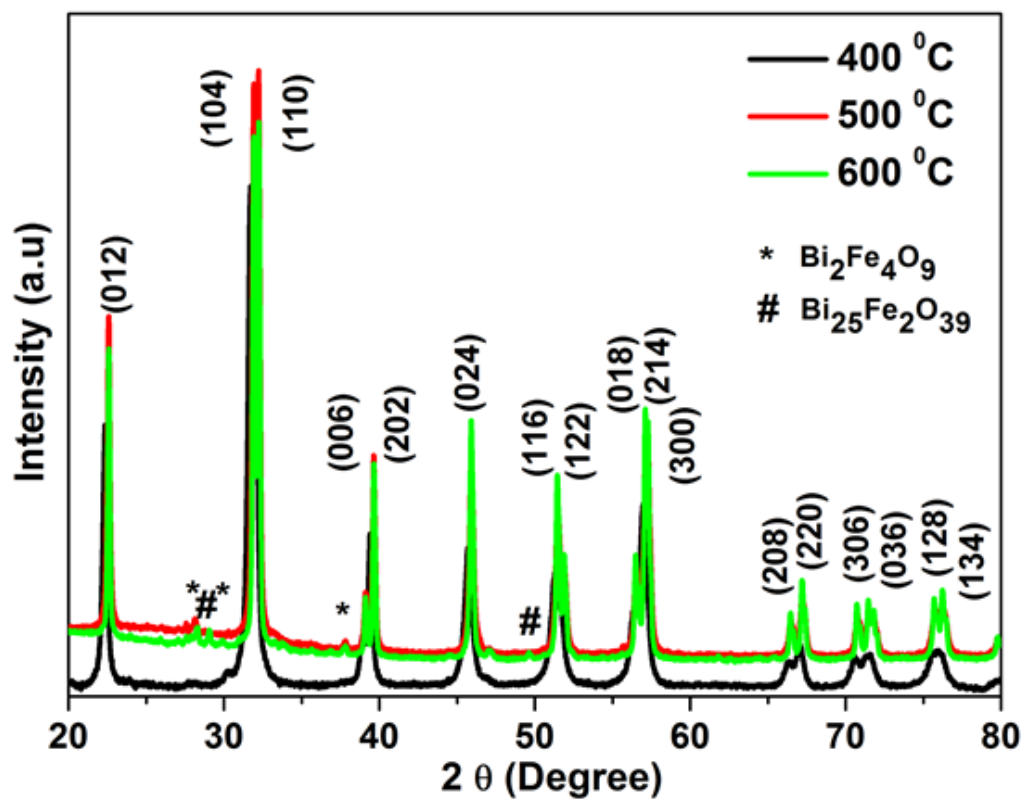

1.1 Figure S1 XRD pattern of BFO calcined at 400 °C, 500°C and 600°C

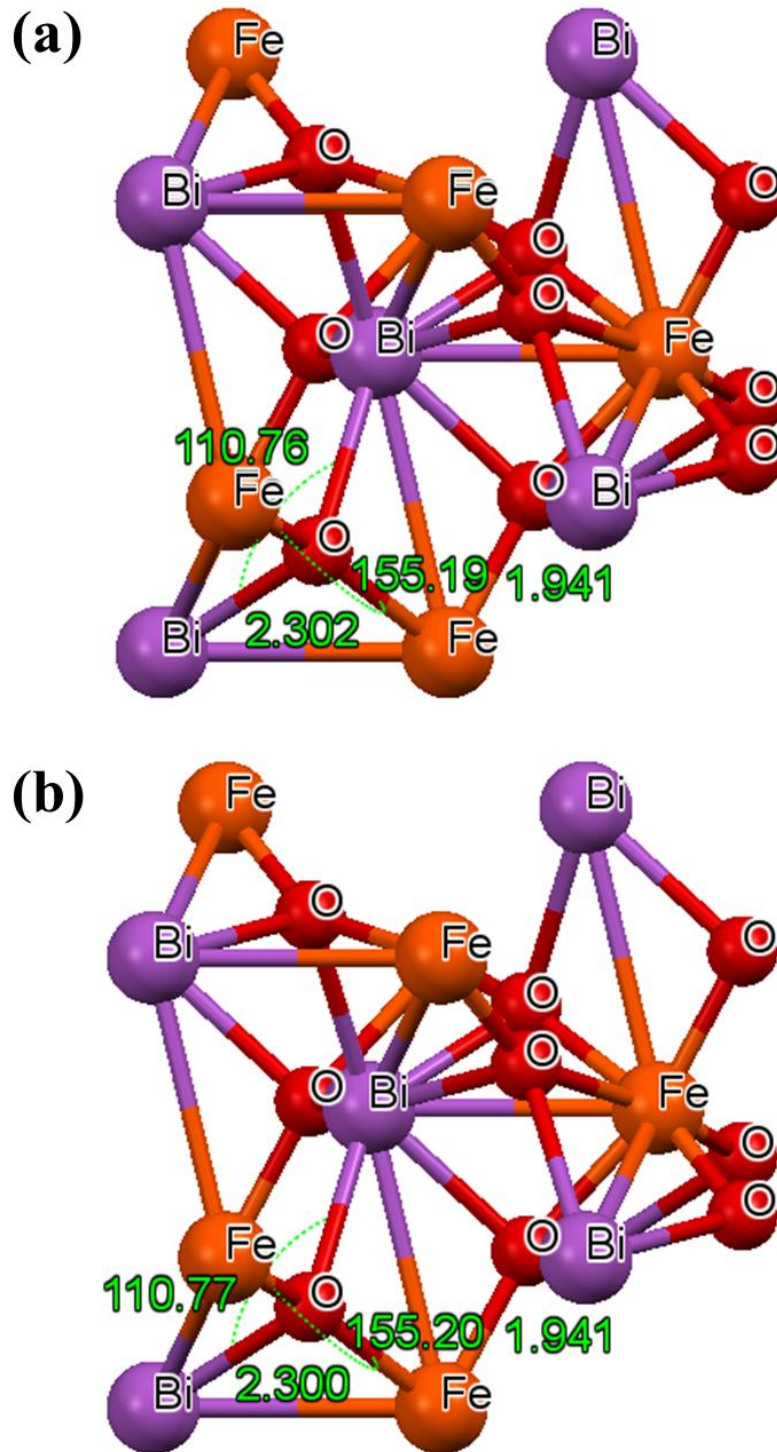

1.2 Figure S2 Rhombohedral cage of (a) BFO, (b) RGO-BFO

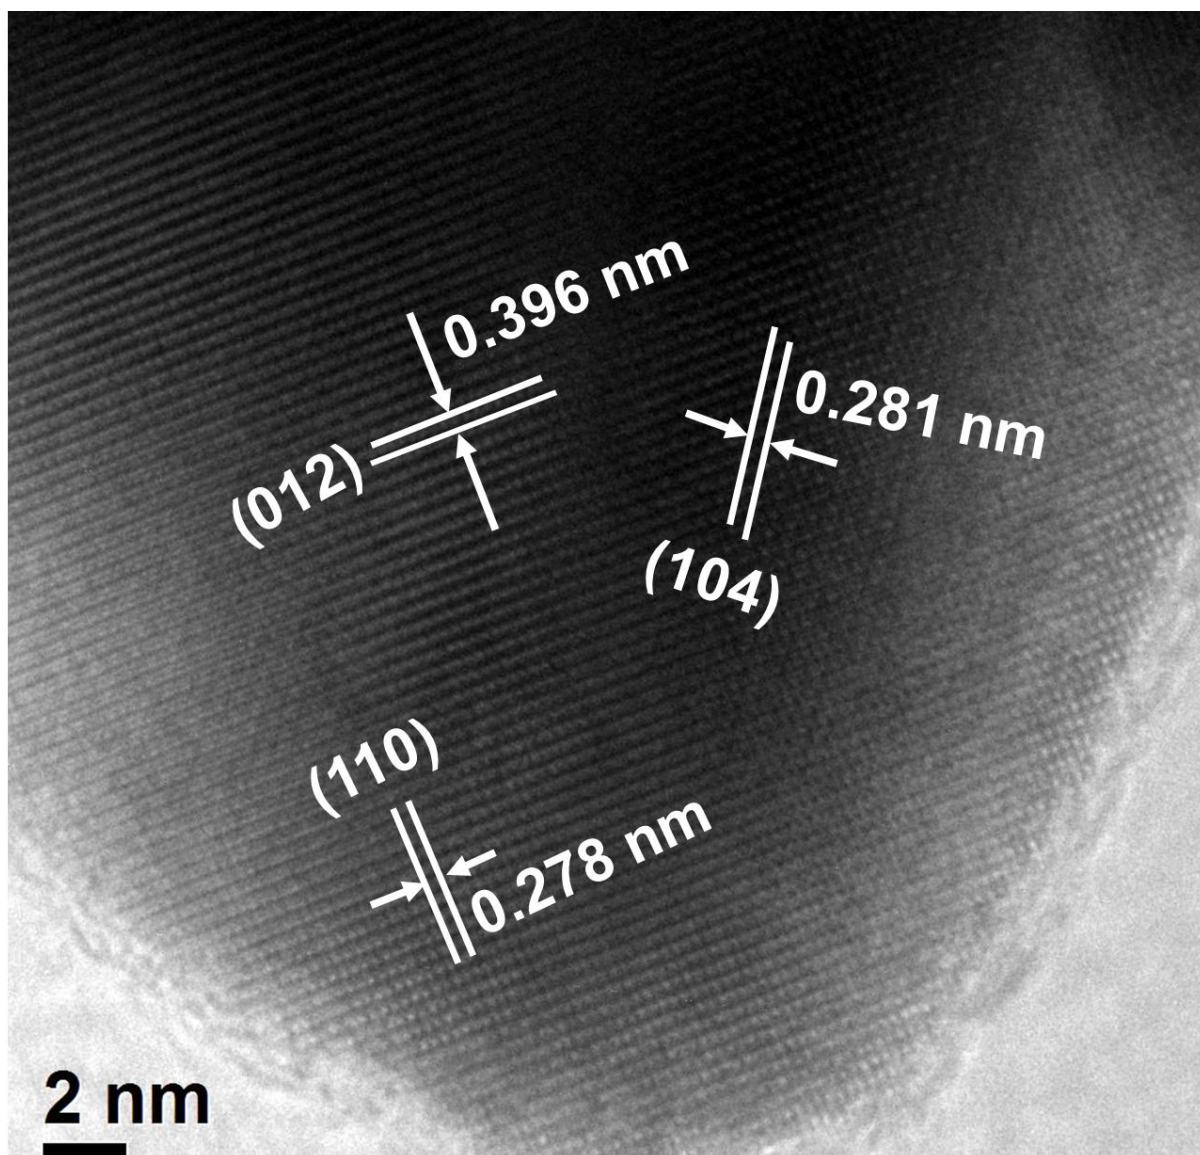

1.3 Figure S3 HRTEM image of BFO

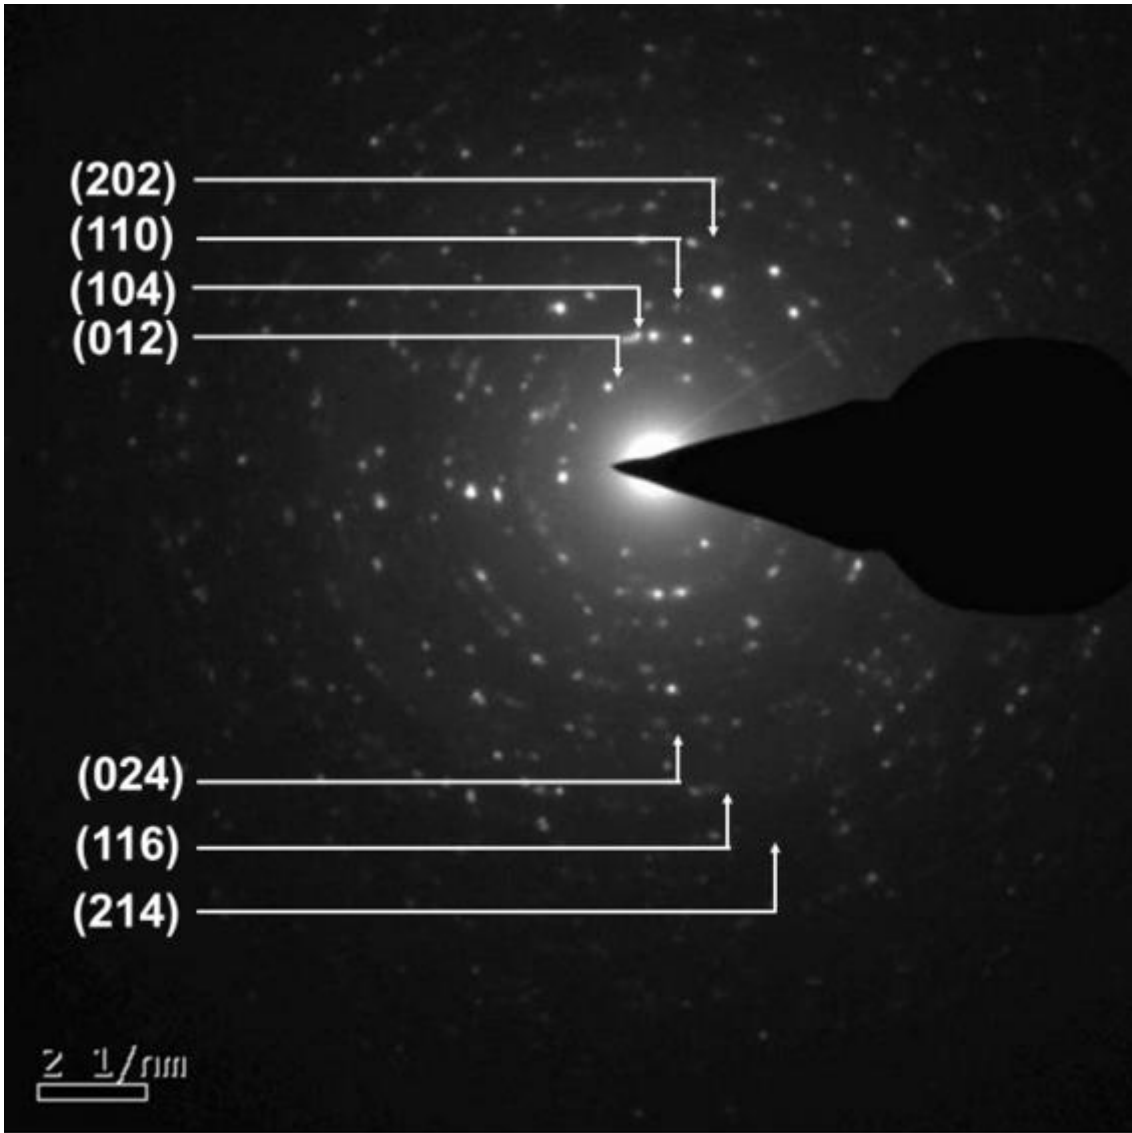

1.4 Figure S4 SAED pattern of BFO

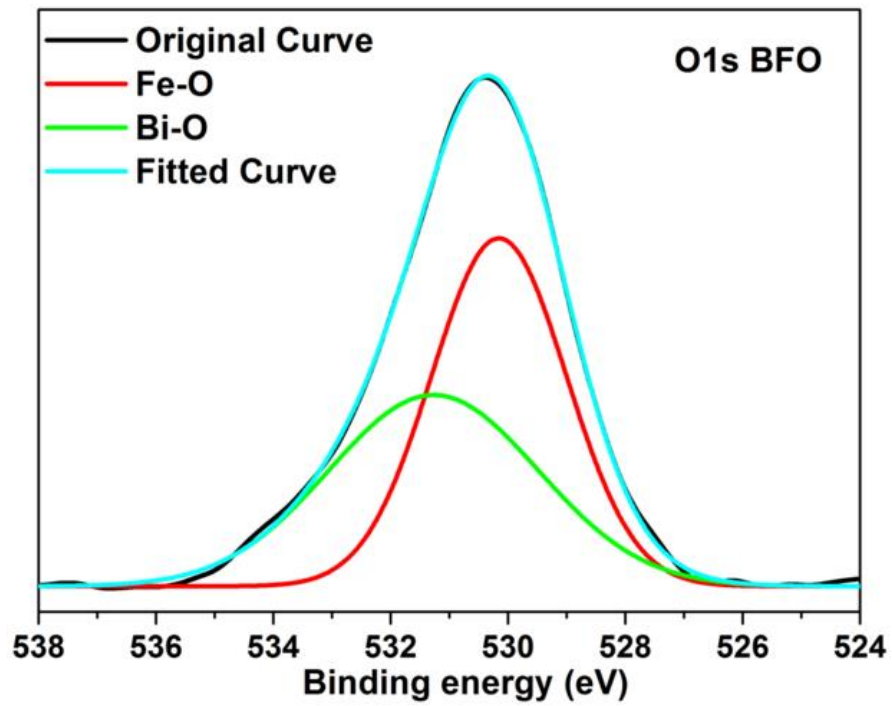

1.5 Figure S5 O1s core-level electron of BFO

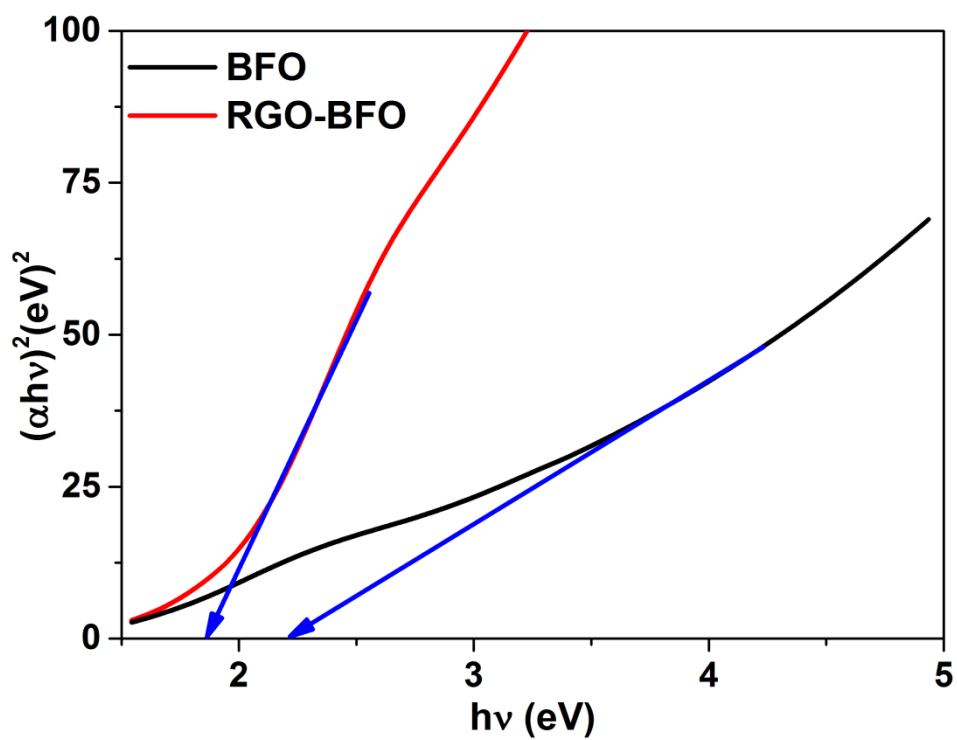

1.6 Figure S6 Tauc plot for determining band gap of BFO and RGO-BFO.



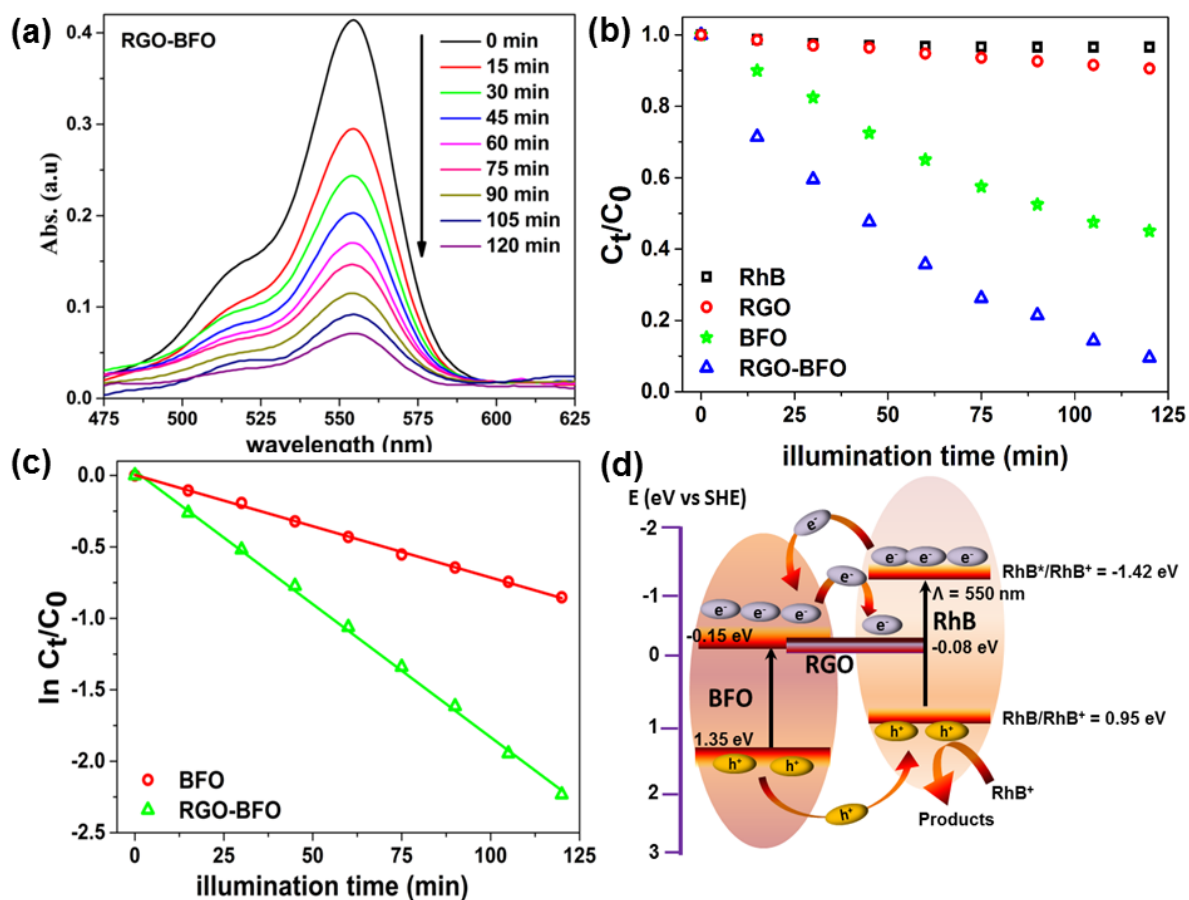

1.7 Figure S7 (a) Degradation of Uv-vis spectra of RhB over RGO-BFO, (b) Photocatalytic degradation efficiency of RhB without and with RGO-BFO, (c) Pseudo first order rate constant for the photodecomposition, (d) Energy diagram of RhB, RGO and BFO

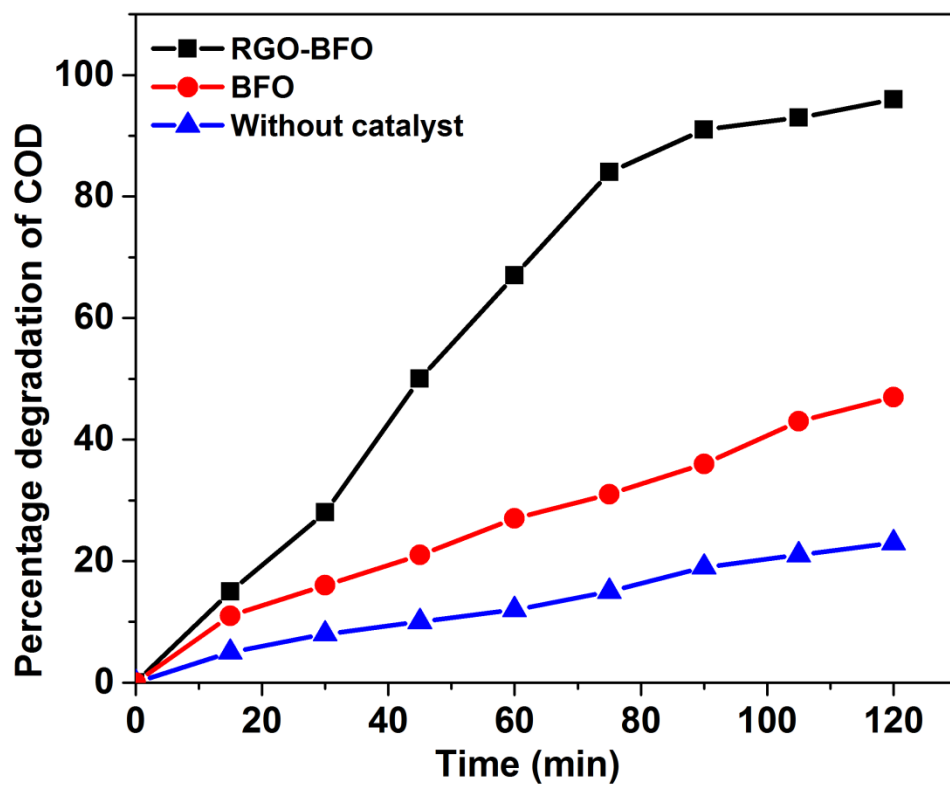

1.8 Figure S8 Percentage degradation of RhB dye in terms of COD values with time for different RGO and RGO-BFO

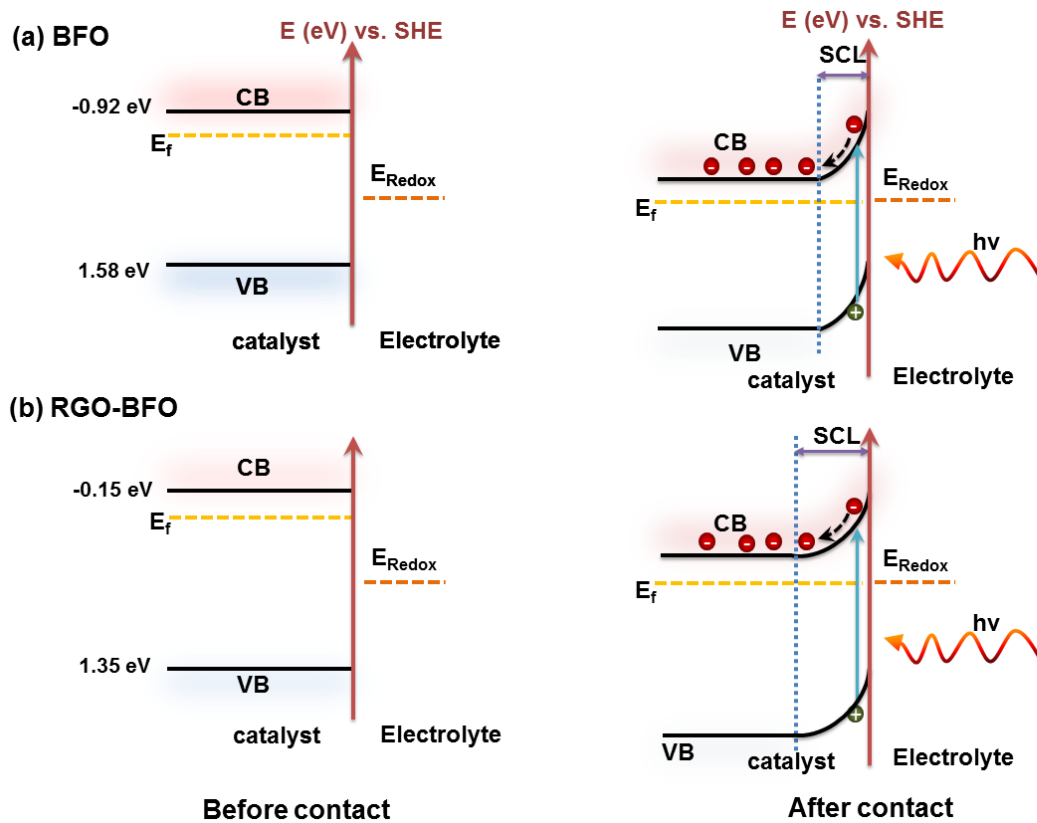

1.9 Figure S9 Schematic diagram of band bending for (a) BFO and (b) RGO-BFO in 1M KOH electrolyte

### 1.10 Table S1 Reitveld refinement parameters of BFO and RGO-BFO

| Sample                         | BFO        | RGO-BFO     |             |
|--------------------------------|------------|-------------|-------------|
| a (Å)= b (Å)                   | 5.571 (6)  | 5.568 (8)   |             |
| c (Å)                          | 13.854 (8) | 13.851 (7)  |             |
| Cell Volume (Å <sup>3</sup> )  | 372.36 (9) | 371.72 (8)  |             |
| Crystallite Size (nm)          | 20.2 (3)   | 18.8 (3)    |             |
| MicroStrain x 10 <sup>-3</sup> | 2.00 (2)   | 2.11 (4)    |             |
| GOF ( $\chi^2$ )               | 1.07       | 1.03        |             |
| <b>Bond lengths (Å)</b>        |            |             |             |
| Fe-O                           | 1.941      | 1.941       |             |
| Bi-O                           | 2.302      | 2.300       |             |
| <b>Bond Angles (°)</b>         |            |             |             |
| Fe-O-Fe                        | 155.19     | 155.20      |             |
| Bi-O-Bi                        | 110.76     | 109.77      |             |
| <b>Atomic Position</b>         |            |             |             |
| x                              | Bi         | 0           | 0           |
|                                | Fe         | 0           | 0           |
|                                | O          | 0.4430 (8)  | 0.4428 (5)  |
| y                              | Bi         | 0           | 0           |
|                                | Fe         | 0           | 0           |
|                                | O          | 0.0132 (9)  | 0.0128 (2)  |
| z                              | Bi         | 0           | 0           |
|                                | Fe         | 0.22216 (5) | 0.22211 (6) |
|                                | O          | 0.9540 (6)  | 0.9535 (5)  |
| R <sub>wp</sub>                | 18.5       | 18.3        |             |
| R <sub>p</sub>                 | 4.4        | 4.1         |             |
| R <sub>Bragg</sub>             | 5.1        | 4.7         |             |

### 1.11 Table S2. Various Raman modes observed in BFO

| Position (cm <sup>-1</sup> ) | 115    | 123    | 157    | 180    | 197    | 214    | 230    | 270    | 477    | 534    | 606    |
|------------------------------|--------|--------|--------|--------|--------|--------|--------|--------|--------|--------|--------|
| Mode                         | E(TO1) | E(LO1) | A(LO1) | A(TO1) | A(LO2) | E(TO2) | A(TO2) | E(TO3) | E(TO4) | E(TO5) | E(TO6) |

**1.12 Table S3. Performance comparison of different catalysts including RGO-BFO for degradation of various organic contaminant.**

| Catalyst                               | Catalyst concentration (mg.ml <sup>-1</sup> ) | Contaminant     | Degradation % | Degradation Time (min) | Rate constant                 | Ref              |
|----------------------------------------|-----------------------------------------------|-----------------|---------------|------------------------|-------------------------------|------------------|
| <b>RGO-BFO</b>                         | <b>0.33</b>                                   | <b>RhB</b>      | <b>91</b>     | <b>120</b>             | <b>1.86 x 10<sup>-2</sup></b> | <b>This work</b> |
| BFO/(BiFe) <sub>2</sub> O <sub>3</sub> | --                                            | Gaseous Toluene | 54            | 180                    | --                            | 1                |
| BFO/TiO <sub>2</sub>                   | 2                                             | Congo Red       | 70            | 120                    | --                            | 2                |
| BFO/RGO                                | 0.5                                           | Bisphenol A     | 99            | 70                     | --                            | 3                |
| BFO/RGO                                | 1                                             | Congo Red       | 75            | 120                    | 1.8 x 10 <sup>-2</sup>        | 4                |
| 10% Gd doped BFO                       | 1                                             | RhB             | 94            | 120                    | --                            | 5                |
| BFO/RGO                                | 1                                             | Congo Red       | 70            | 120                    | 0.96 x 10 <sup>-2</sup>       | 6                |

**1.13 Table S4. Performance comparison of various catalysts including RGO-BFO for Photoelectrochemical water splitting**

| Catalyst                                                                              | Photocurrent density (mA.cm <sup>-2</sup> ) | Onset potential (V)     | STH %      | Ref              |
|---------------------------------------------------------------------------------------|---------------------------------------------|-------------------------|------------|------------------|
| <b>RGO-BFO</b>                                                                        | <b>10.2 at 0.6 V (Ag/AgCl)</b>              | <b>0.32 V (Ag/AgCl)</b> | <b>3.3</b> | <b>This work</b> |
| BFO                                                                                   | 4.0 at 0.6 V (Ag/AgCl)                      | 0.4 V (Ag/AgCl)         | 0.75       | This work        |
| BiVO <sub>4</sub> /TiO <sub>2</sub>                                                   | 4.44 at 1.23 V (RHE)                        | -0.14 V (RHE)           | 2.87       | <sup>7</sup>     |
| CaFe <sub>2</sub> O <sub>4</sub> /TaON                                                | 1.26 at 1.23 V (RHE)                        | 0.7 V (RHE)             | 0.55       | <sup>8</sup>     |
| Fe <sub>2</sub> O <sub>3</sub> /RGO/BiV <sub>1-x</sub> Mo <sub>x</sub> O <sub>4</sub> | 1.97 at 1 (Ag/AgCl)                         | 0.33 V (Ag/AgCl)        | 0.53       | <sup>9</sup>     |
| A-Fe <sub>2</sub> O <sub>3</sub> /NiMnO <sub>x</sub>                                  | 2.35 at 0.23 (Ag/AgCl)                      | -0.1 V (Ag/AgCl)        | 0.85       | <sup>10</sup>    |
| Co-Pi/ZFO/Ti:Fe <sub>2</sub> O <sub>3</sub>                                           | 3.6 at 1.23 (RHE)                           | 0.85 (RHE)              | 0.33       | <sup>11</sup>    |
| RGO-MoS <sub>2</sub> /NiCo <sub>2</sub> O <sub>4</sub>                                | 5.36 at 0.8 V (Ag/AgCl)                     | 0.1 V (Ag/AgCl)         | 3.08       | <sup>12</sup>    |
| Fe <sub>2</sub> O <sub>3</sub> -RGO                                                   | 2 at 1.6 V (RHE)                            | 0.88 V (RHE)            | 0.102      | <sup>13</sup>    |
| TiO <sub>2</sub> /RGO/NiFe                                                            | 1.74 at 0.6 V (SCE)                         | -0.3 V (SCE)            | 0.58       | <sup>14</sup>    |

## References

- (1) Kong, J.; Rui, Z.; Wang, X.; Ji, H.; Tong, Y. Visible-Light Decomposition of Gaseous Toluene over BiFeO<sub>3</sub>–(Bi/Fe)<sub>2</sub>O<sub>3</sub> Heterojunctions with Enhanced Performance. *Chem. Eng. J.* **2016**, *302*, 552–559.
- (2) Li, S.; Lin, Y.; Zhang, B.; Li, J.; Nan, C. BiFeO<sub>3</sub>/TiO<sub>2</sub> Core-Shell Structured Nanocomposites as Visible-Active Photocatalysts and Their Optical Response Mechanism. *J. Appl. Phys.* **2009**, *105*, 054310.
- (3) Soltani, T.; Lee, B. Sono-Synthesis of Nanocrystallized BiFeO<sub>3</sub>/Reduced Graphene Oxide Composites for Visible Photocatalytic Degradation Improvement of Bisphenol A. *Chem. Eng. J.* **2016**, *306*, 204–213.
- (4) Li, Z.; Shen, Y.; Yang, C.; Lei, Y.; Guan, Y.; Lin, Y.; Liu, D.; Nan, C. Significant Enhancement in the Visible Light Photocatalytic Properties of BiFeO<sub>3</sub>–graphene Nanohybrids. *J. Mater. Chem. A* **2013**, *1*, 823–829.
- (5) Guo, R.; Fang, L.; Dong, W.; Zheng, F.; Shen, M. Enhanced Photocatalytic Activity and Ferromagnetism in Gd Doped BiFeO<sub>3</sub> Nanoparticles. *J. Phys. Chem. C* **2010**, *114*, 21390–21396.
- (6) Li, Z.; Shen, Y.; Guan, Y.; Hu, Y.; Lin, Y.; Nan, C.-W. Bandgap Engineering and Enhanced Interface Coupling of Graphene–BiFeO<sub>3</sub> Nanocomposites as Efficient Photocatalysts under Visible Light. *J. Mater. Chem. A* **2014**, *2* (6), 1967–1973.
- (7) Singh, A. P.; Kodan, N.; Mehta, B. R.; Held, A.; Mayrhofer, L.; Moseler, M. Band Edge Engineering in BiVO<sub>4</sub>/TiO<sub>2</sub> Heterostructure: Enhanced Photoelectrochemical Performance through Improved Charge Transfer. *ACS Catalysis* **2016**, *6* (8), 5311–5318.
- (8) Kim, E. S.; Nishimura, N.; Magesh, G.; Kim, J. Y.; Jang, J. W.; Jun, H.; Kubota, J.; Domen, K.; Lee, J. S. Fabrication of CaFe<sub>2</sub>O<sub>4</sub>/TaON Heterojunction Photoanode for Photoelectrochemical Water Oxidation. *Journal of the American Chemical Society* **2013**, *135* (14), 5375–5383.
- (9) Hou, Y.; Zuo, F.; Dagg, A.; Feng, P. Visible Light-Driven α-Fe<sub>2</sub>O<sub>3</sub> Nanorod/Graphene/BiVO<sub>4</sub>-XMOxO<sub>4</sub> Core/Shell Heterojunction Array for Efficient Photoelectrochemical Water Splitting. *Nano Letters* **2012**, *12* (12), 6464–6473.
- (10) Bhandary, N.; Singh, A. P.; Ingole, P. P.; Basu, S. Enhanced Photoelectrochemical Performance of Electrodeposited Hematite Films Decorated with Nanostructured NiMnO<sub>x</sub>. *RSC Adv.* **2016**, *6* (42), 35239–35247.
- (11) Chen, Y. J.; Chen, L. Y. The Study of Carrier Transfer Mechanism for Nanostructural Hematite Photoanode for Solar Water Splitting. *Applied Energy* **2016**, *164*, 924–933.
- (12) Chakrabarty, S.; Mukherjee, A.; Basu, S. RGO-MoS<sub>2</sub> Supported NiCo<sub>2</sub>O<sub>4</sub> Catalyst toward Solar Water Splitting and Dye Degradation. *ACS Sustainable Chemistry & Engineering* **2018**, *6*, 5238–5247.
- (13) Tamirat, A. G.; Su, W. N.; Dubale, A. A.; Pan, C. J.; Chen, H. M.; Ayele, D. W.; Lee,

- J. F.; Hwang, B. J. Efficient Photoelectrochemical Water Splitting Using Three Dimensional Urchin-like Hematite Nanostructure Modified with Reduced Graphene Oxide. *Journal of Power Sources***2015**, 287, 119–128.
- (14) Ning, F.; Shao, M.; Xu, S.; Fu, Y.; Zhang, R.; Wei, M.; Evans, D. G.; Duan, X. TiO<sub>2</sub>/Graphene/NiFe-Layered Double Hydroxide Nanorod Array Photoanodes for Efficient Photoelectrochemical Water Splitting. *Energy Environ. Sci.***2016**, 9 (8), 2633–2643.
